# Supplementary material for: STIMA: a short screening test for ideo-motor apraxia, selective for action meaning and bodily district
Source: Springer Nature journal article supplement (doi:10.1007/s10072-015-2203-4), 2015-04-06
Supplement: MOESM1 [file 10072_2015_2203_MOESM1_ESM.docx]

**Supplemental Table 1** – ***Known*** *gestures subscale (range 0-36). From Raw-scores and Age, Equivalent and Percentile scores are obtained.*

|  |  | Equivalent | |  |  |  |  |  |  |  | Percentile | |  |  |  |
| --- | --- | --- | --- | --- | --- | --- | --- | --- | --- | --- | --- | --- | --- | --- | --- |
|  |  | 0 | 1 |  | 2 |  | 3 |  | 4 |  | 5 | 10 | 25 | 50 | 75 |
|  |  | < | From | To | from | to | from | to | > |  |  |  |  |  |  |
|  |  |  |  |  |  |  |  |  |  |  |  |  |  |  |  |
| *Corrected* |  | *33.2* | *33.2* | *34.1* | *34.1* | *34.8* | *34.8* | *35.5* | *35.5* |  | *33.7* | *34.1* | *34.7* | *35.5* | *36* |
|  |  |  |  |  |  |  |  |  |  |  |  |  |  |  |  |
|  | **Age** |  |  |  |  |  |  |  |  |  |  |  |  |  |  |
| **Raw scores** | **30** | 33.2 | 33.2 | 34.1 | 34.1 | 34.8 | 34.8 | 35.5 | 35.5 |  | 33.7 | 34.1 | 34.7 | 35.5 | 36 |
|  | **33** | 33.2 | 33.2 | 34 | 34 | 34.7 | 34.7 | 35.5 | 35.5 |  | 33.6 | 34 | 34.7 | 35.5 | 36 |
|  | **36** | 33.1 | 33.1 | 34 | 34 | 34.7 | 34.7 | 35.4 | 35.4 |  | 33.6 | 34 | 34.7 | 35.4 | 36 |
|  | **39** | 33 | 33 | 33.9 | 33.9 | 34.6 | 34.6 | 35.4 | 35.4 |  | 33.4 | 33.9 | 34.6 | 35.4 | 36 |
|  | **42** | 32.8 | 32.8 | 33.7 | 33.7 | 34.5 | 34.5 | 35.3 | 35.3 |  | 33.3 | 33.7 | 34.5 | 35.3 | 35.9 |
|  | **45** | 32.5 | 32.5 | 33.5 | 33.5 | 34.4 | 34.4 | 35.3 | 35.3 |  | 33 | 33.5 | 34.3 | 35.3 | 35.9 |
|  | **48** | 32.1 | 32.1 | 33.3 | 33.3 | 34.2 | 34.2 | 35.2 | 35.2 |  | 32.7 | 33.3 | 34.1 | 35.2 | 35.9 |
|  | **51** | 31.7 | 31.7 | 33 | 33 | 34 | 34 | 35 | 35 |  | 32.4 | 33 | 33.9 | 35 | 35.8 |
|  | **54** | 31.3 | 31.3 | 32.6 | 32.6 | 33.7 | 33.7 | 34.9 | 34.9 |  | 32 | 32.6 | 33.7 | 34.9 | 35.8 |
|  | **57** | 30.8 | 30.8 | 32.2 | 32.2 | 33.5 | 33.5 | 34.8 | 34.8 |  | 31.5 | 32.2 | 33.4 | 34.8 | 35.7 |
|  | **60** | 30.2 | 30.2 | 31.8 | 31.8 | 33.2 | 33.2 | 34.6 | 34.6 |  | 31 | 31.8 | 33.1 | 34.6 | 35.6 |
|  | **63** | 29.6 | 29.6 | 31.3 | 31.3 | 32.8 | 32.8 | 34.4 | 34.4 |  | 30.5 | 31.3 | 32.8 | 34.4 | 35.5 |
|  | **66** | 28.8 | 28.8 | 30.8 | 30.8 | 32.5 | 32.5 | 34.2 | 34.2 |  | 29.9 | 30.8 | 32.4 | 34.2 | 35.4 |
|  | **69** | 28.1 | 28.1 | 30.3 | 30.3 | 32.1 | 32.1 | 34 | 34 |  | 29.2 | 30.3 | 32 | 34 | 35.3 |
|  | **72** | 27.3 | 27.3 | 29.7 | 29.7 | 31.6 | 31.6 | 33.7 | 33.7 |  | 28.5 | 29.7 | 31.5 | 33.7 | 35.2 |
|  | **75** | 26.4 | 26.4 | 29 | 29 | 31.2 | 31.2 | 33.5 | 33.5 |  | 27.7 | 29 | 31.1 | 33.5 | 35.1 |
|  | **78** | 25.4 | 25.4 | 28.3 | 28.3 | 30.7 | 30.7 | 33.2 | 33.2 |  | 26.9 | 28.3 | 30.6 | 33.2 | 35 |
|  | **81** | 24.4 | 24.4 | 27.6 | 27.6 | 30.1 | 30.1 | 32.9 | 32.9 |  | 26.1 | 27.6 | 30 | 32.9 | 34.9 |
|  | **84** | 23.4 | 23.4 | 26.8 | 26.8 | 29.6 | 29.6 | 32.6 | 32.6 |  | 25.1 | 26.8 | 29.5 | 32.6 | 34.7 |

**Supplemental Table 2** – ***New*** *gestures subscale (range 0-36). From Raw-scores and Age, Equivalent and Percentile scores are obtained.*

|  |  | Equivalent | |  |  |  |  |  |  |  | Percentile | |  |  |  |
| --- | --- | --- | --- | --- | --- | --- | --- | --- | --- | --- | --- | --- | --- | --- | --- |
|  |  | 0 | 1 |  | 2 |  | 3 |  | 4 |  | 5 | 10 | 25 | 50 | 75 |
|  |  | < | from | to | from | to | from | to | > |  |  |  |  |  |  |
|  |  |  |  |  |  |  |  |  |  |  |  |  |  |  |  |
| *Corrected* |  | *27.8* | *27.8* | *31.1* | *31.1* | *32.9* | *32.9* | *33.9* | *33.9* |  | *29.6* | *31.1* | *32.8* | *33.9* | *35.3* |
|  |  |  |  |  |  |  |  |  |  |  |  |  |  |  |  |
|  | **Age** |  |  |  |  |  |  |  |  |  |  |  |  |  |  |
| **Raw scores** | **30** | 27.8 | 27.8 | 31.1 | 31.1 | 32.9 | 32.9 | 33.9 | 33.9 |  | 29.6 | 31.1 | 32.8 | 33.9 | 35.3 |
|  | **33** | 27.8 | 27.8 | 31.1 | 31.1 | 32.9 | 32.9 | 33.9 | 33.9 |  | 29.5 | 31.1 | 32.8 | 33.9 | 35.3 |
|  | **36** | 27.7 | 27.7 | 31 | 31 | 32.8 | 32.8 | 33.8 | 33.8 |  | 29.5 | 31 | 32.7 | 33.8 | 35.2 |
|  | **39** | 27.5 | 27.5 | 30.9 | 30.9 | 32.7 | 32.7 | 33.8 | 33.8 |  | 29.4 | 30.9 | 32.6 | 33.8 | 35.2 |
|  | **42** | 27.3 | 27.3 | 30.8 | 30.8 | 32.6 | 32.6 | 33.6 | 33.6 |  | 29.2 | 30.8 | 32.5 | 33.6 | 35.1 |
|  | **45** | 27.1 | 27.1 | 30.6 | 30.6 | 32.4 | 32.4 | 33.5 | 33.5 |  | 29 | 30.6 | 32.3 | 33.5 | 34.9 |
|  | **48** | 26.8 | 26.8 | 30.3 | 30.3 | 32.2 | 32.2 | 33.3 | 33.3 |  | 28.7 | 30.3 | 32.1 | 33.3 | 34.8 |
|  | **51** | 26.4 | 26.4 | 30.1 | 30.1 | 32 | 32 | 33.1 | 33.1 |  | 28.4 | 30 | 31.9 | 33.1 | 34.6 |
|  | **54** | 26 | 26 | 29.7 | 29.7 | 31.7 | 31.7 | 32.8 | 32.8 |  | 28 | 29.7 | 31.6 | 32.8 | 34.4 |
|  | **57** | 25.6 | 25.6 | 29.4 | 29.4 | 31.4 | 31.4 | 32.6 | 32.6 |  | 27.6 | 29.4 | 31.3 | 32.6 | 34.1 |
|  | **60** | 25 | 25 | 29 | 29 | 31 | 31 | 32.2 | 32.2 |  | 27.1 | 28.9 | 30.9 | 32.2 | 33.9 |
|  | **63** | 24.4 | 24.4 | 28.5 | 28.5 | 30.6 | 30.6 | 31.9 | 31.9 |  | 26.6 | 28.5 | 30.6 | 31.9 | 33.6 |
|  | **66** | 23.8 | 23.8 | 28 | 28 | 30.2 | 30.2 | 31.5 | 31.5 |  | 26 | 28 | 30.1 | 31.5 | 33.2 |
|  | **69** | 23.1 | 23.1 | 27.5 | 27.5 | 29.7 | 29.7 | 31.1 | 31.1 |  | 25.4 | 27.4 | 29.7 | 31.1 | 32.9 |
|  | **72** | 22.4 | 22.4 | 26.9 | 26.9 | 29.2 | 29.2 | 30.6 | 30.6 |  | 24.8 | 26.9 | 29.1 | 30.6 | 32.5 |
|  | **75** | 21.6 | 21.6 | 26.2 | 26.2 | 28.7 | 28.7 | 30.1 | 30.1 |  | 24.1 | 26.2 | 28.6 | 30.1 | 32.1 |
|  | **78** | 20.7 | 20.7 | 25.6 | 25.6 | 28.1 | 28.1 | 29.6 | 29.6 |  | 23.3 | 25.5 | 28 | 29.6 | 31.6 |
|  | **81** | 19.8 | 19.8 | 24.8 | 24.8 | 27.5 | 27.5 | 29.1 | 29.1 |  | 22.5 | 24.8 | 27.4 | 29.1 | 31.2 |
|  | **84** | 18.8 | 18.8 | 24.1 | 24.1 | 26.8 | 26.8 | 28.5 | 28.5 |  | 21.6 | 24.1 | 26.7 | 28.5 | 30.7 |

**Supplemental Table 3** – ***Proximal*** *gestures subscale (range 0-36). From Raw-scores and Age, Equivalent and Percentile scores are obtained.*

|  | |  | | | Equivalent | | | |  | |  | | |  | | | Percentile | |  | | |  | |  | |  |  |  |  |
| --- | --- | --- | --- | --- | --- | --- | --- | --- | --- | --- | --- | --- | --- | --- | --- | --- | --- | --- | --- | --- | --- | --- | --- | --- | --- | --- | --- | --- | --- |
|  |  | | 0 | 1 | |  | 2 |  | | 3 | |  | 4 | |  | 5 | | 10 | | 25 | 50 | | 75 | |
|  |  | | < | From | | to | from | to | | from | | to | > | |  |  | |  | |  |  | |  | |
|  |  | |  |  | |  |  |  | |  | |  |  | |  |  | |  | |  |  | |  | |
| *Corrected* |  | | *32.1* | *32.1* | | *33.2* | *33.2* | *34.2* | | *34.2* | | *35* | *35* | |  | *32.9* | | *33.2* | | *34.2* | *35* | | *35.9* | |
|  |  | |  |  | |  |  |  | |  | |  |  | |  |  | |  | |  |  | |  | |
|  | **Age** | |  |  | |  |  |  | |  | |  |  | |  |  | |  | |  |  | |  | |
| **Raw scores** | **30** | | 32.1 | 32.1 | | 33.2 | 33.2 | 34.2 | | 34.2 | | 35 | 35 | |  | 32.9 | | 33.2 | | 34.2 | 35 | | 35.9 | |
|  | **33** | | 32.1 | 32.1 | | 33.2 | 33.2 | 34.2 | | 34.2 | | 35 | 35 | |  | 32.9 | | 33.1 | | 34.2 | 35 | | 35.9 | |
|  | **36** | | 32 | 32 | | 33.2 | 33.2 | 34.2 | | 34.2 | | 35 | 35 | |  | 32.8 | | 33.1 | | 34.1 | 35 | | 35.9 | |
|  | **39** | | 31.9 | 31.9 | | 33.1 | 33.1 | 34.1 | | 34.1 | | 35 | 35 | |  | 32.7 | | 33 | | 34 | 35 | | 35.8 | |
|  | **42** | | 31.8 | 31.8 | | 32.9 | 32.9 | 34 | | 34 | | 34.9 | 34.9 | |  | 32.6 | | 32.9 | | 33.9 | 34.9 | | 35.8 | |
|  | **45** | | 31.5 | 31.5 | | 32.8 | 32.8 | 33.9 | | 33.9 | | 34.8 | 34.8 | |  | 32.4 | | 32.7 | | 33.8 | 34.8 | | 35.8 | |
|  | **48** | | 31.3 | 31.3 | | 32.6 | 32.6 | 33.7 | | 33.7 | | 34.7 | 34.7 | |  | 32.2 | | 32.5 | | 33.7 | 34.7 | | 35.7 | |
|  | **51** | | 31 | 31 | | 32.3 | 32.3 | 33.6 | | 33.6 | | 34.6 | 34.6 | |  | 31.9 | | 32.2 | | 33.5 | 34.6 | | 35.6 | |
|  | **54** | | 30.6 | 30.6 | | 32.1 | 32.1 | 33.4 | | 33.4 | | 34.4 | 34.4 | |  | 31.6 | | 32 | | 33.3 | 34.4 | | 35.6 | |
|  | **57** | | 30.2 | 30.2 | | 31.7 | 31.7 | 33.1 | | 33.1 | | 34.3 | 34.3 | |  | 31.3 | | 31.6 | | 33.1 | 34.3 | | 35.5 | |
|  | **60** | | 29.8 | 29.8 | | 31.4 | 31.4 | 32.9 | | 32.9 | | 34.1 | 34.1 | |  | 30.9 | | 31.3 | | 32.8 | 34.1 | | 35.4 | |
|  | **63** | | 29.3 | 29.3 | | 31 | 31 | 32.6 | | 32.6 | | 33.9 | 33.9 | |  | 30.5 | | 30.9 | | 32.5 | 33.9 | | 35.3 | |
|  | **66** | | 28.7 | 28.7 | | 30.6 | 30.6 | 32.3 | | 32.3 | | 33.7 | 33.7 | |  | 30 | | 30.5 | | 32.2 | 33.7 | | 35.2 | |
|  | **69** | | 28.1 | 28.1 | | 30.1 | 30.1 | 32 | | 32 | | 33.5 | 33.5 | |  | 29.5 | | 30 | | 31.9 | 33.5 | | 35 | |
|  | **72** | | 27.5 | 27.5 | | 29.6 | 29.6 | 31.6 | | 31.6 | | 33.2 | 33.2 | |  | 29 | | 29.5 | | 31.5 | 33.2 | | 34.9 | |
|  | **75** | | 26.8 | 26.8 | | 29.1 | 29.1 | 31.2 | | 31.2 | | 32.9 | 32.9 | |  | 28.4 | | 29 | | 31.1 | 32.9 | | 34.8 | |
|  | **78** | | 26 | 26 | | 28.5 | 28.5 | 30.8 | | 30.8 | | 32.7 | 32.7 | |  | 27.8 | | 28.4 | | 30.7 | 32.7 | | 34.6 | |
|  | **81** | | 25.3 | 25.3 | | 27.9 | 27.9 | 30.4 | | 30.4 | | 32.3 | 32.3 | |  | 27.1 | | 27.8 | | 30.2 | 32.3 | | 34.4 | |
|  | **84** | | 24.4 | 24.4 | | 27.3 | 27.3 | 29.9 | | 29.9 | | 32 | 32 | |  | 26.4 | | 27.1 | | 29.7 | 32 | | 34.3 | |

**Supplemental Table 4** – ***Distal*** *gestures subscale (range 0-36). From Raw-scores and Age, Equivalent and Percentile scores are obtained.*

|  | |  | | | Equivalent | | | |  | |  | | |  | | | Percentile | |  | | |  | |  | |  |  |  |  |
| --- | --- | --- | --- | --- | --- | --- | --- | --- | --- | --- | --- | --- | --- | --- | --- | --- | --- | --- | --- | --- | --- | --- | --- | --- | --- | --- | --- | --- | --- |
|  |  | | 0 | 1 | |  | 2 |  | | 3 | |  | 4 | |  | 5 | | 10 | | 25 | 50 | | 75 | |
|  |  | | < | From | | to | from | to | | from | | to | > | |  |  | |  | |  |  | |  | |
|  |  | |  |  | |  |  |  | |  | |  |  | |  |  | |  | |  |  | |  | |
| *Corrected* |  | | *29,4* | *29,4* | | *31,7* | *31,7* | *33,5* | | *33,5* | | *34,7* | *34,7* | |  | *30,2* | | *31,5* | | *33,4* | *34,7* | | *35,9* | |
|  |  | |  |  | |  |  |  | |  | |  |  | |  |  | |  | |  |  | |  | |
|  | **Age** | |  |  | |  |  |  | |  | |  |  | |  |  | |  | |  |  | |  | |
| **Raw scores** | **30** | | 29,4 | 29,4 | | 31,7 | 31,7 | 33,5 | | 33,5 | | 34,7 | 34,7 | |  | 30,2 | | 31,5 | | 33,4 | 34,7 | | 35,9 | |
|  | **33** | | 29,4 | 29,4 | | 31,7 | 31,7 | 33,5 | | 33,5 | | 34,7 | 34,7 | |  | 30,2 | | 31,4 | | 33,3 | 34,7 | | 35,8 | |
|  | **36** | | 29,3 | 29,3 | | 31,6 | 31,6 | 33,4 | | 33,4 | | 34,6 | 34,6 | |  | 30,1 | | 31,3 | | 33,3 | 34,6 | | 35,8 | |
|  | **39** | | 29,1 | 29,1 | | 31,5 | 31,5 | 33,3 | | 33,3 | | 34,6 | 34,6 | |  | 29,9 | | 31,2 | | 33,2 | 34,6 | | 35,7 | |
|  | **42** | | 28,9 | 28,9 | | 31,3 | 31,3 | 33,2 | | 33,2 | | 34,4 | 34,4 | |  | 29,7 | | 31 | | 33 | 34,4 | | 35,7 | |
|  | **45** | | 28,5 | 28,5 | | 31,1 | 31,1 | 33 | | 33 | | 34,3 | 34,3 | |  | 29,4 | | 30,7 | | 32,8 | 34,3 | | 35,6 | |
|  | **48** | | 28,1 | 28,1 | | 30,8 | 30,8 | 32,8 | | 32,8 | | 34,1 | 34,1 | |  | 29 | | 30,4 | | 32,6 | 34,1 | | 35,4 | |
|  | **51** | | 27,7 | 27,7 | | 30,4 | 30,4 | 32,5 | | 32,5 | | 33,9 | 33,9 | |  | 28,6 | | 30,1 | | 32,3 | 33,9 | | 35,3 | |
|  | **54** | | 27,1 | 27,1 | | 30 | 30 | 32,2 | | 32,2 | | 33,7 | 33,7 | |  | 28,1 | | 29,6 | | 32 | 33,7 | | 35,1 | |
|  | **57** | | 26,5 | 26,5 | | 29,5 | 29,5 | 31,8 | | 31,8 | | 33,4 | 33,4 | |  | 27,5 | | 29,1 | | 31,7 | 33,4 | | 34,9 | |
|  | **60** | | 25,8 | 25,8 | | 29 | 29 | 31,5 | | 31,5 | | 33,1 | 33,1 | |  | 26,9 | | 28,6 | | 31,3 | 33,1 | | 34,7 | |
|  | **63** | | 25,1 | 25,1 | | 28,4 | 28,4 | 31 | | 31 | | 32,8 | 32,8 | |  | 26,2 | | 28 | | 30,8 | 32,8 | | 34,5 | |
|  | **66** | | 24,2 | 24,2 | | 27,8 | 27,8 | 30,6 | | 30,6 | | 32,4 | 32,4 | |  | 25,4 | | 27,4 | | 30,3 | 32,4 | | 34,2 | |
|  | **69** | | 23,3 | 23,3 | | 27,1 | 27,1 | 30 | | 30 | | 32 | 32 | |  | 24,6 | | 26,6 | | 29,8 | 32 | | 34 | |
|  | **72** | | 22,3 | 22,3 | | 26,4 | 26,4 | 29,5 | | 29,5 | | 31,6 | 31,6 | |  | 23,7 | | 25,9 | | 29,3 | 31,6 | | 33,6 | |
|  | **75** | | 21,3 | 21,3 | | 25,6 | 25,6 | 28,9 | | 28,9 | | 31,2 | 31,2 | |  | 22,7 | | 25,1 | | 28,6 | 31,2 | | 33,3 | |
|  | **78** | | 20,1 | 20,1 | | 24,8 | 24,8 | 28,3 | | 28,3 | | 30,7 | 30,7 | |  | 21,7 | | 24,2 | | 28 | 30,7 | | 33 | |
|  | **81** | | 18,9 | 18,9 | | 23,9 | 23,9 | 27,6 | | 27,6 | | 30,2 | 30,2 | |  | 20,6 | | 23,2 | | 27,3 | 30,2 | | 32,6 | |
|  | **84** | | 17,7 | 17,7 | | 22,9 | 22,9 | 26,9 | | 26,9 | | 29,6 | 29,6 | |  | 19,4 | | 22,2 | | 26,6 | 29,6 | | 32,2 | |

**Supplemental Table 5** – ***Known Proximal*** *gestures subscale (range 0-18). From Raw-scores and Age, Equivalent and Percentile scores are obtained.*

|  |  | Equivalent | |  |  |  |  |  |  |  | Percentile | |  |  |
| --- | --- | --- | --- | --- | --- | --- | --- | --- | --- | --- | --- | --- | --- | --- |
|  |  | 0 | 1 |  | 2 |  | 3 |  | 4 |  | 5 | 10 | 25 | 50 |
|  |  | < | from | to | from | to | from | to | > |  |  |  |  |  |
|  |  |  |  |  |  |  |  |  |  |  |  |  |  |  |
| *Corrected* |  | *16.4* | *16.4* | *17* | *17* | *17.4* | *17.4* | *18* |  |  | *16.6* | *17* | *17.3* | *18* |
|  |  |  |  |  |  |  |  |  |  |  |  |  |  |  |
|  | **Age** |  |  |  |  |  |  |  |  |  |  |  |  |  |
| **Raw scores** | **30** | 16.4 | 16.4 | 17 | 17 | 17.4 | 17.4 | 18 |  |  | 16.6 | 17 | 17.3 | 18 |
|  | **33** | 16.4 | 16.4 | 17 | 17 | 17.4 | 17.4 | 18 |  |  | 16.6 | 17 | 17.3 | 18 |
|  | **36** | 16.4 | 16.4 | 16.9 | 16.9 | 17.3 | 17.3 | 18 |  |  | 16.5 | 16.9 | 17.2 | 18 |
|  | **39** | 16.3 | 16.3 | 16.9 | 16.9 | 17.3 | 17.3 | 18 |  |  | 16.5 | 16.9 | 17.2 | 18 |
|  | **42** | 16.1 | 16.1 | 16.8 | 16.8 | 17.2 | 17.2 | 18 |  |  | 16.3 | 16.8 | 17.1 | 18 |
|  | **45** | 16 | 16 | 16.7 | 16.7 | 17.2 | 17.2 | 18 |  |  | 16.2 | 16.7 | 17.1 | 18 |
|  | **48** | 15.8 | 15.8 | 16.6 | 16.6 | 17.1 | 17.1 | 17.9 | 17.9 |  | 16 | 16.5 | 17 | 17.9 |
|  | **51** | 15.6 | 15.6 | 16.4 | 16.4 | 17 | 17 | 17.9 | 17.9 |  | 15.8 | 16.4 | 16.8 | 17.9 |
|  | **54** | 15.3 | 15.3 | 16.2 | 16.2 | 16.8 | 16.8 | 17.9 | 17.9 |  | 15.6 | 16.2 | 16.7 | 17.9 |
|  | **57** | 15 | 15 | 16 | 16 | 16.7 | 16.7 | 17.9 | 17.9 |  | 15.3 | 16 | 16.6 | 17.9 |
|  | **60** | 14.7 | 14.7 | 15.8 | 15.8 | 16.5 | 16.5 | 17.8 | 17.8 |  | 15 | 15.8 | 16.4 | 17.8 |
|  | **63** | 14.3 | 14.3 | 15.6 | 15.6 | 16.4 | 16.4 | 17.8 | 17.8 |  | 14.7 | 15.5 | 16.2 | 17.8 |
|  | **66** | 13.9 | 13.9 | 15.3 | 15.3 | 16.2 | 16.2 | 17.7 | 17.7 |  | 14.3 | 15.2 | 16 | 17.7 |
|  | **69** | 13.5 | 13.5 | 15 | 15 | 16 | 16 | 17.7 | 17.7 |  | 14 | 14.9 | 15.8 | 17.7 |
|  | **72** | 13 | 13 | 14.7 | 14.7 | 15.8 | 15.8 | 17.7 | 17.7 |  | 13.5 | 14.6 | 15.5 | 17.7 |
|  | **75** | 12.5 | 12.5 | 14.3 | 14.3 | 15.5 | 15.5 | 17.6 | 17.6 |  | 13.1 | 14.3 | 15.3 | 17.6 |
|  | **78** | 12 | 12 | 14 | 14 | 15.3 | 15.3 | 17.5 | 17.5 |  | 12.6 | 13.9 | 15 | 17.5 |
|  | **81** | 11.4 | 11.4 | 13.6 | 13.6 | 15 | 15 | 17.5 | 17.5 |  | 12.1 | 13.5 | 14.7 | 17.5 |
|  | **84** | 10.8 | 10.8 | 13.2 | 13.2 | 14.7 | 14.7 | 17.4 | 17.4 |  | 11.5 | 13.1 | 14.4 | 17.4 |

**Supplemental Table 6** – ***Known Distal*** *gestures subscale (range 0-18). From Raw-scores, Age and Education, Equivalent and Percentile scores are obtained.*

|  |  |  | Equivalent | |  |  |  |  |  |  |  | Percentile | |  |  |
| --- | --- | --- | --- | --- | --- | --- | --- | --- | --- | --- | --- | --- | --- | --- | --- |
|  |  |  | 0 | 1 |  | 2 |  | 3 |  | 4 |  | 5 | 10 | 25 | 50 |
|  |  |  | < | from | to | from | to | from | to | > |  |  |  |  |  |
|  |  |  |  |  |  |  |  |  |  |  |  |  |  |  |  |
| *Corrected* |  |  | *17.3* | *17.3* | *17.6* | *17.6* | *17.8* | *17.8* | *18* |  |  | *17.4* | *17.5* | *17.8* | *18* |
|  |  |  |  |  |  |  |  |  |  |  |  |  |  |  |  |
|  | **Age** | **Education** |  |  |  |  |  |  |  |  |  |  |  |  |  |
| **Raw scores** | **30** | **5** | 15.6 | 15.6 | 16.5 | 16.5 | 17.2 | 17.2 | 18 |  |  | 16 | 16.4 | 17.2 | 18 |
|  | **30** | **8** | 15.9 | 15.9 | 16.7 | 16.7 | 17.4 | 17.4 | 18 |  |  | 16.3 | 16.6 | 17.3 | 18 |
|  | **30** | **13** | 16.5 | 16.5 | 17.1 | 17.1 | 17.5 | 17.5 | 18 |  |  | 16.8 | 17 | 17.5 | 18 |
|  | **30** | **18** | 17.1 | 17.1 | 17.4 | 17.4 | 17.7 | 17.7 | 18 |  |  | 17.2 | 17.4 | 17.7 | 18 |
|  | **40** | **5** | 15.4 | 15.4 | 16.3 | 16.3 | 17.1 | 17.1 | 17.9 | 17.9 |  | 15.8 | 16.2 | 17.1 | 17.9 |
|  | **40** | **8** | 15.7 | 15.7 | 16.6 | 16.6 | 17.2 | 17.2 | 17.9 | 17.9 |  | 16.1 | 16.5 | 17.2 | 17.9 |
|  | **40** | **13** | 16.3 | 16.3 | 17 | 17 | 17.4 | 17.4 | 17.9 | 17.9 |  | 16.6 | 16.9 | 17.4 | 17.9 |
|  | **40** | **18** | 17 | 17 | 17.3 | 17.3 | 17.6 | 17.6 | 17.9 | 17.9 |  | 17.1 | 17.3 | 17.6 | 17.9 |
|  | **50** | **5** | 14.7 | 14.7 | 15.9 | 15.9 | 16.8 | 16.8 | 17.8 | 17.8 |  | 15.2 | 15.7 | 16.7 | 17.8 |
|  | **50** | **8** | 15.1 | 15.1 | 16.1 | 16.1 | 16.9 | 16.9 | 17.8 | 17.8 |  | 15.6 | 16 | 16.9 | 17.8 |
|  | **50** | **13** | 15.9 | 15.9 | 16.6 | 16.6 | 17.2 | 17.2 | 17.8 | 17.8 |  | 16.2 | 16.5 | 17.1 | 17.8 |
|  | **50** | **18** | 16.6 | 16.6 | 17.1 | 17.1 | 17.4 | 17.4 | 17.8 | 17.8 |  | 16.8 | 17 | 17.4 | 17.8 |
|  | **60** | **5** | 13.6 | 13.6 | 15.1 | 15.1 | 16.3 | 16.3 | 17.5 | 17.5 |  | 14.3 | 14.9 | 16.1 | 17.5 |
|  | **60** | **8** | 14.1 | 14.1 | 15.4 | 15.4 | 16.4 | 16.4 | 17.5 | 17.5 |  | 14.7 | 15.3 | 16.3 | 17.5 |
|  | **60** | **13** | 15.1 | 15.1 | 16 | 16 | 16.7 | 16.7 | 17.5 | 17.5 |  | 15.5 | 15.9 | 16.7 | 17.5 |
|  | **60** | **18** | 16 | 16 | 16.6 | 16.6 | 17 | 17 | 17.5 | 17.5 |  | 16.3 | 16.5 | 17 | 17.5 |
|  | **70** | **5** | 12 | 12 | 13.9 | 13.9 | 15.5 | 15.5 | 17.1 | 17.1 |  | 12.9 | 13.7 | 15.4 | 17.1 |
|  | **70** | **8** | 12.7 | 12.7 | 14.4 | 14.4 | 15.7 | 15.7 | 17.1 | 17.1 |  | 13.5 | 14.2 | 15.6 | 17.1 |
|  | **70** | **13** | 13.9 | 13.9 | 15.1 | 15.1 | 16.1 | 16.1 | 17.1 | 17.1 |  | 14.5 | 15 | 16 | 17.1 |
|  | **70** | **18** | 15.2 | 15.2 | 15.9 | 15.9 | 16.5 | 16.5 | 17.1 | 17.1 |  | 15.5 | 15.8 | 16.5 | 17.1 |
|  | **80** | **5** | 9.95 | 9.95 | 12.5 | 12.5 | 14.5 | 14.5 | 16.6 | 16.6 |  | 11.1 | 12.2 | 14.3 | 16.6 |
|  | **80** | **8** | 10.9 | 10.9 | 13.1 | 13.1 | 14.8 | 14.8 | 16.6 | 16.6 |  | 11.9 | 12.9 | 14.7 | 16.6 |
|  | **80** | **13** | 12.5 | 12.5 | 14.1 | 14.1 | 15.3 | 15.3 | 16.6 | 16.6 |  | 13.2 | 13.9 | 15.2 | 16.6 |
|  | **80** | **18** | 14.1 | 14.1 | 15.1 | 15.1 | 15.8 | 15.8 | 16.6 | 16.6 |  | 14.5 | 15 | 15.8 | 16.6 |
|  | **85** | **5** | 8.76 | 8.76 | 11.6 | 11.6 | 14 | 14 | 16.4 | 16.4 |  | 10.1 | 11.4 | 13.7 | 16.4 |
|  | **85** | **8** | 9.85 | 9.85 | 12.3 | 12.3 | 14.3 | 14.3 | 16.4 | 16.4 |  | 11 | 12.1 | 14.1 | 16.4 |
|  | **85** | **13** | 11.7 | 11.7 | 13.4 | 13.4 | 14.9 | 14.9 | 16.4 | 16.4 |  | 12.5 | 13.3 | 14.7 | 16.4 |
|  | **85** | **18** | 13.5 | 13.5 | 14.6 | 14.6 | 15.4 | 15.4 | 16.4 | 16.4 |  | 14 | 14.5 | 15.4 | 16.4 |

**Supplemental Table 7** – ***New Proximal*** *gestures subscale (range 0-18). From Raw-scores and Age, Equivalent and Percentile scores are obtained.*

|  |  | Equivalent | |  |  |  |  |  |  |  | Percentile | |  |  |  |
| --- | --- | --- | --- | --- | --- | --- | --- | --- | --- | --- | --- | --- | --- | --- | --- |
|  |  | 0 | 1 |  | 2 |  | 3 |  | 4 |  | 5 | 10 | 25 | 50 | 75 |
|  |  | < | from | to | from | to | from | to | > |  |  |  |  |  |  |
|  |  |  |  |  |  |  |  |  |  |  |  |  |  |  |  |
| *Corrected* |  | *15.5* | *15.5* | *16.2* | *16.2* | *16.7* | *16.7* | *17.2* | *17.2* |  | *15.8* | *16.2* | *16.7* | *17.2* | *18.0* |
|  |  |  |  |  |  |  |  |  |  |  |  |  |  |  |  |
|  | **Age** |  |  |  |  |  |  |  |  |  |  |  |  |  |  |
| **Raw scores** | **30** | 15.5 | 15.5 | 16.2 | 16.2 | 16.7 | 16.7 | 17.2 | 17.2 |  | 15.8 | 16.2 | 16.7 | 17.2 | 18 |
|  | **33** | 15.5 | 15.5 | 16.2 | 16.2 | 16.7 | 16.7 | 17.2 | 17.2 |  | 15.8 | 16.2 | 16.7 | 17.2 | 18 |
|  | **36** | 15.5 | 15.5 | 16.1 | 16.1 | 16.7 | 16.7 | 17.2 | 17.2 |  | 15.8 | 16.1 | 16.6 | 17.2 | 18 |
|  | **39** | 15.4 | 15.4 | 16 | 16 | 16.6 | 16.6 | 17.2 | 17.2 |  | 15.7 | 16 | 16.6 | 17.2 | 18 |
|  | **42** | 15.3 | 15.3 | 16 | 16 | 16.6 | 16.6 | 17.1 | 17.1 |  | 15.6 | 16 | 16.5 | 17.1 | 18 |
|  | **45** | 15.1 | 15.1 | 15.8 | 15.8 | 16.5 | 16.5 | 17.1 | 17.1 |  | 15.4 | 15.8 | 16.4 | 17.1 | 18 |
|  | **48** | 14.9 | 14.9 | 15.7 | 15.7 | 16.4 | 16.4 | 17 | 17 |  | 15.3 | 15.7 | 16.3 | 17 | 18 |
|  | **51** | 14.7 | 14.7 | 15.5 | 15.5 | 16.3 | 16.3 | 16.9 | 16.9 |  | 15.1 | 15.5 | 16.2 | 16.9 | 18 |
|  | **54** | 14.4 | 14.4 | 15.3 | 15.3 | 16.1 | 16.1 | 16.8 | 16.8 |  | 14.8 | 15.3 | 16.1 | 16.8 | 18 |
|  | **57** | 14.1 | 14.1 | 15.1 | 15.1 | 16 | 16 | 16.8 | 16.8 |  | 14.6 | 15.1 | 15.9 | 16.8 | 18 |
|  | **60** | 13.8 | 13.8 | 14.9 | 14.9 | 15.8 | 15.8 | 16.6 | 16.6 |  | 14.3 | 14.9 | 15.7 | 16.6 | 18 |
|  | **63** | 13.4 | 13.4 | 14.6 | 14.6 | 15.6 | 15.6 | 16.5 | 16.5 |  | 14 | 14.6 | 15.5 | 16.5 | 18 |
|  | **66** | 13 | 13 | 14.3 | 14.3 | 15.4 | 15.4 | 16.4 | 16.4 |  | 13.6 | 14.3 | 15.3 | 16.4 | 18 |
|  | **69** | 12.6 | 12.6 | 14 | 14 | 15.2 | 15.2 | 16.3 | 16.3 |  | 13.2 | 14 | 15.1 | 16.3 | 18 |
|  | **72** | 12.1 | 12.1 | 13.6 | 13.6 | 14.9 | 14.9 | 16.1 | 16.1 |  | 12.8 | 13.6 | 14.8 | 16.1 | 18 |
|  | **75** | 11.6 | 11.6 | 13.3 | 13.3 | 14.6 | 14.6 | 15.9 | 15.9 |  | 12.4 | 13.3 | 14.5 | 15.9 | 18 |
|  | **78** | 11.1 | 11.1 | 12.9 | 12.9 | 14.4 | 14.4 | 15.8 | 15.8 |  | 11.9 | 12.9 | 14.2 | 15.8 | 18 |
|  | **81** | 10.5 | 10.5 | 12.4 | 12.4 | 14.1 | 14.1 | 15.6 | 15.6 |  | 11.4 | 12.4 | 13.9 | 15.6 | 18 |
|  | **84** | 9.93 | 9.93 | 12 | 12 | 13.7 | 13.7 | 15.4 | 15.4 |  | 10.8 | 12 | 13.6 | 15.4 | 18 |

**Supplemental Table** 8 – ***New Distal*** *gestures subscale (range 0-18). From Raw-scores and Age, Equivalent and Percentile scores are obtained.*

|  |  | Equivalent | |  |  |  |  |  |  |  | Percentile | |  |  |  |
| --- | --- | --- | --- | --- | --- | --- | --- | --- | --- | --- | --- | --- | --- | --- | --- |
|  |  | 0 | 1 |  | 2 |  | 3 |  | 4 |  | 5 | 10 | 25 | 50 | 75 |
|  |  | < | from | to | from | to | from | to | > |  |  |  |  |  |  |
|  |  |  |  |  |  |  |  |  |  |  |  |  |  |  |  |
| *Corrected* |  | *12.6* | *12.6* | *14.5* | *14.5* | *16.2* | *16.2* | *16.9* | *16.9* |  | *13.2* | *14.3* | *16.1* | *16.9* | *18* |
|  |  |  |  |  |  |  |  |  |  |  |  |  |  |  |  |
|  | **Age** |  |  |  |  |  |  |  |  |  |  |  |  |  |  |
| **Raw scores** | **30** | 12.6 | 12.6 | 14.5 | 14.5 | 16.2 | 16.2 | 16.9 | 16.9 |  | 13.2 | 14.3 | 16.1 | 16.9 | 18 |
|  | **33** | 12.6 | 12.6 | 14.5 | 14.5 | 16.2 | 16.2 | 16.9 | 16.9 |  | 13.2 | 14.3 | 16.1 | 16.9 | 18 |
|  | **36** | 12.6 | 12.6 | 14.5 | 14.5 | 16.1 | 16.1 | 16.8 | 16.8 |  | 13.2 | 14.2 | 16.1 | 16.8 | 18 |
|  | **39** | 12.5 | 12.5 | 14.4 | 14.4 | 16.1 | 16.1 | 16.8 | 16.8 |  | 13.1 | 14.2 | 16 | 16.8 | 17.9 |
|  | **42** | 12.4 | 12.4 | 14.3 | 14.3 | 16 | 16 | 16.7 | 16.7 |  | 13 | 14.1 | 15.9 | 16.7 | 17.8 |
|  | **45** | 12.2 | 12.2 | 14.2 | 14.2 | 15.9 | 15.9 | 16.6 | 16.6 |  | 12.9 | 14 | 15.8 | 16.6 | 17.7 |
|  | **48** | 12.1 | 12.1 | 14 | 14 | 15.7 | 15.7 | 16.4 | 16.4 |  | 12.7 | 13.8 | 15.6 | 16.4 | 17.6 |
|  | **51** | 11.9 | 11.9 | 13.8 | 13.8 | 15.5 | 15.5 | 16.3 | 16.3 |  | 12.5 | 13.6 | 15.5 | 16.3 | 17.4 |
|  | **54** | 11.7 | 11.7 | 13.6 | 13.6 | 15.4 | 15.4 | 16.1 | 16.1 |  | 12.3 | 13.4 | 15.3 | 16.1 | 17.2 |
|  | **57** | 11.4 | 11.4 | 13.4 | 13.4 | 15.1 | 15.1 | 15.8 | 15.8 |  | 12 | 13.2 | 15 | 15.8 | 17 |
|  | **60** | 11.1 | 11.1 | 13.1 | 13.1 | 14.9 | 14.9 | 15.6 | 15.6 |  | 11.8 | 12.9 | 14.8 | 15.6 | 16.8 |
|  | **63** | 10.8 | 10.8 | 12.8 | 12.8 | 14.6 | 14.6 | 15.3 | 15.3 |  | 11.5 | 12.6 | 14.5 | 15.3 | 16.5 |
|  | **66** | 10.5 | 10.5 | 12.5 | 12.5 | 14.3 | 14.3 | 15 | 15 |  | 11.1 | 12.3 | 14.2 | 15 | 16.2 |
|  | **69** | 10.1 | 10.1 | 12.2 | 12.2 | 14 | 14 | 14.7 | 14.7 |  | 10.8 | 11.9 | 13.9 | 14.7 | 15.9 |
|  | **72** | 9.7 | 9.7 | 11.8 | 11.8 | 13.6 | 13.6 | 14.4 | 14.4 |  | 10.4 | 11.5 | 13.5 | 14.4 | 15.6 |
|  | **75** | 9.27 | 9.27 | 11.4 | 11.4 | 13.2 | 13.2 | 14 | 14 |  | 9.94 | 11.1 | 13.1 | 14 | 15.2 |
|  | **78** | 8.8 | 8.8 | 10.9 | 10.9 | 12.8 | 12.8 | 13.6 | 13.6 |  | 9.49 | 10.7 | 12.7 | 13.6 | 14.9 |
|  | **81** | 8.31 | 8.31 | 10.5 | 10.5 | 12.4 | 12.4 | 13.2 | 13.2 |  | 9.01 | 10.2 | 12.3 | 13.2 | 14.5 |
|  | **84** | 7.79 | 7.79 | 10 | 10 | 11.9 | 11.9 | 12.7 | 12.7 |  | 8.5 | 9.75 | 11.8 | 12.7 | 14 |
