# Supplementary material for: STIMA: a short screening test for ideo-motor apraxia, selective for action meaning and bodily district
Source: Springer Nature journal article supplement (doi:10.1007/s10072-015-2203-4), 2015-04-06
Supplement: MOESM2 [file 10072_2015_2203_MOESM2_ESM.docx]

**Appendix**

List of then known and new gestures used in the test. In the brackets a “D” indicates the case of mainly distal gestures and a “P” the case of a mainly proximal gestures.

KNOWN GESTURES

01. I am tired/ I go to sleep (P)

02. Military salute (P)

03. I am hungry (P)

04. No! (D)

05. Hallo (D)

06. Later (D)

07. Silence! (P)

08. Crazy (P)

09. Stop! (P)

10. Well done (D)

11. Come here! (D)

12. Finger crossed (D)

13. Hitch-hiking (P)

14. Listening (P)

15. strength (P)

16. So-and-so/more or less (D)

17. Go away (D)

18. Victory (D)

NEW GESTURES

01. Horizontal Palm up on the abdomen (P)

02. Horizontal back hand under the chin (P)

03. Hand over the opposite shoulder (P)

04. Pinkie straight down (D)

05. Thumb close the middle finger (D)

06. closed fist with the palm up and the thumb pointing outward (D)

07. Back of the hand horizon placed on the eyes (P)

08. Back of the hand on the controlateral cheek (P)

09. Palm of the hand on the nape (P)

10. Extended thumb and pinkie, other fingers closed in a fist and hand positioned with the back toward the observer (D)

11. Horizontal hand with the middle finger over the index finger (D)

12. Fist with the thumb extended toward the body midline (D)

13. Palm of the hand on the ipsilateral shoulder (P)

14. Palm of the hand toward the observer and positioned perpendicularly over the head (P)

15. Back of the hand toward the observer, hand upright with the top of the finger under the chin (P)

16. Hand closed in a fist, with the back toward the observer and positioned over the pinkie with the index finger poiting toward the body midline (D)

17. Back of the hand toward the observer and hand lying on the pinkie side with the thumb closed to the index finger (D)

18. Hand closed around the thumb in a fist (D)
